# Supplementary material for: A conceptual framework to guide clinical learning for student nurses in a Nursing Education Institution in Gauteng, South Africa
Source: Research Square preprint supplement (doi:10.21203/rs.3.rs-8469639/v1), 2026-02-22
Supplement: Supplementary file 1 [file f585b4fef2e210ac34d73f35.docx]

**A conceptual framework to guide clinical learning for student nurses in a Nursing Education Institution in Gauteng, South Africa**

**Highlights**

- Purpose of the Study: To develop a framework to guide clinical learning for student nurses
- Qualitative, exploratory, descriptive, contextual design
- Phases:
- Concept analysis
- Perceptions of clinical learning opportunities
- Framework development
- Evaluation of the framework
- Framework focus: Dynamic healthcare settings, critical roles of nurse educators, clinical facilitators, and operational managers, student nurses as active participants, collaborative and problem-based clinical learning activities, community-based research activities and the use of emerging technologies
- Expected outcomes: Autonomous, confident, and competent healthcare professionals with the acquired higher-order skills. Socialization into the profession and global competitiveness
